# Supplementary material for: Waiting-Time Distribution of M/DN/1 Queues Through Numerical Laplace Inversion
Source: Atypon-hosted journal article supplement (doi:10.1287/ijoc.1050.0148), 2007-02-01
Supplement: ijoc.1050.0148-sm-shortle-2.pdf [file ijoc.1050.0148-sm-shortle-2.pdf]

Online Supplement to  
“Waiting Time Distribution of  $M/D_N/1$  Queues  
Through Numerical Laplace Inversion”  
*INFORMS Journal on Computing, 2005*

John F. Shortle

Department of Systems Engineering and Operations Research, George Mason University, 4400 University  
Drive, MS 4A6, Fairfax, Virginia 22030, USA, jshortle@gmu.edu

Martin J. Fischer

Mitretek Systems, 3150 Fairview Park Drive South, Falls Church, Virginia 22042, USA,  
mfischer@mitretek.org

Percy H. Brill

University of Windsor, Windsor, Ontario, Canada N9B 3P4, brill@uwindsor.ca

## 1. Theorem Proofs

This Online Supplement gives proofs for all theorems in Shortle et al. (2005).

**Proof of Theorem 1.** Step 1. We show there exists a unique solution to (3) (see Shortle et al. 2005). Multiply (3) by  $e^{-\lambda t}$  and rearrange terms to get:

$$(e^{-\lambda t}W_q(t))' = -\lambda e^{-\lambda t} \sum_{i=1}^N W_q(t - x_i)p_i, \quad t \neq x_j.$$

We assume throughout this proof that the index  $j \in 1, \dots, N$ . This implies

$$W_q(t) = e^{\lambda t} \left( W_q(0) - \int_0^t \lambda e^{-\lambda u} \sum_{i=1}^N W_q(u - x_i)p_i du \right), \quad t \geq 0.$$

Since  $W_q(t)$  is continuous on  $t \geq 0$  (Shortle et al. 2005, sec. 2), the integrand is piecewise continuous. The definite integral of a piecewise continuous function is unique, so  $W_q(t)$  is unique. The solution  $W_q(t)$  is not affected by the fact that  $w_q(t)$ , and hence (3), is not defined at  $t = x_0, x_1, \dots, x_N$ .

Step 2. We show that Euler’s method for numerically solving a differential equation applied to (3) converges to  $W_q(t)$ . First, rewrite (3) as

$$W_q'(t) = \lambda W_q(t) - Q(t), \quad t \neq x_j, \tag{16}$$

$$\text{where } Q(t) \equiv \lambda \sum_{i=1}^N W_q(t - x_i) p_i.$$

Euler's method with a constant step-size  $h$  applied to (16) gives:

$$\hat{F}_n = \hat{F}_{n-1} + h \left( \lambda \hat{F}_{n-1} - Q(h(n-1)) \right). \quad (17)$$

For a differential equation in the form of (16), Euler's method converges uniformly on any finite interval  $[a, b]$  provided  $Q(t)$  is continuous on that interval (e.g., Hairer et al. 1991, theorem 7.3). Here,  $Q(t)$  is only *piecewise* continuous, with discontinuities at each  $x_j$ . Starting with the interval  $[0, x_1]$ , choose  $Q(x_1)$  so that  $Q(t)$  is continuous on  $[0, x_1]$ .  $Q(t)$  is right-continuous, so we do not need to worry about continuity at 0. From Step 1 of this proof, we can define  $Q(x_j)$  to be any value without changing the solution for  $W_q(t)$ . Let  $F_h(t)$  be the Euler polygon connecting the discrete points from (17) with straight lines. Since  $Q(t)$  is continuous on  $[0, x_1]$ , theorem 7.3 from Hairer et al. (1991) shows that Euler's method converges uniformly on  $[0, x_1]$ . That is, for any  $\epsilon > 0$ , there exists  $h^*$  such that  $h \leq h^* \Rightarrow |F_h(t) - W_q(t)| < \epsilon$  on  $[0, x_1]$ , and in particular,  $|F_h(x_1) - W_q(x_1)| < \epsilon$ . We use this as the starting point for the next interval.

On the second interval  $[x_1, x_2]$ , let  $\tilde{F}_h(t)$  be the Euler polygon with step-size  $h$  and initial condition  $\tilde{F}_h(x_1) = W_q(x_1)$ . As before, choose  $Q(x_2)$  so that  $Q(t)$  is continuous on  $[x_1, x_2]$ . For small enough  $h$ ,  $|\tilde{F}_h(t) - W_q(t)| < \epsilon$  on  $[x_1, x_2]$ . Also, by Hairer et al. (1991), Lemma 7.2,  $|F_h(t) - \tilde{F}_h(t)| < \epsilon$  on  $[x_1, x_2]$ , for small enough  $h$ . Thus,  $|F_h(t) - W_q(t)| < \epsilon$  on  $[x_1, x_2]$ . Continuing in the same manner, we can get uniform convergence up to any finite point  $T$ , since there are a finite number of  $x_j$ 's. Also, we trivially get uniform convergence on  $(-\infty, T]$  by defining  $F_h(t) \equiv 0$  for  $t < 0$ .

Step 3. In this step, we show that  $|F_n - W_q(nh)| \rightarrow 0$  as  $h \rightarrow 0$ ,  $nh \rightarrow t$ .

We prove the following induction step: If  $F \rightarrow W_q$  uniformly on  $(-\infty, t]$ , then  $F \rightarrow W_q$  uniformly on  $(-\infty, t + x_1]$ . More specifically, we define uniform convergence on  $(-\infty, t]$  as follows: given any  $\epsilon > 0$  and any sequence  $h_k, n_k$  ( $h_k > 0$ ,  $n_k$  an integer) such that  $h_k \rightarrow 0$ ,  $n_k h_k \rightarrow t$ , then there exists a  $k^*$  such that  $k \geq k^* \Rightarrow |F_{n_k} - W_q(n_k h_k)| < \epsilon, \forall n = -\infty, \dots, n_k - 1, n_k$ . First, the induction hypothesis is trivially satisfied for any  $t < 0$  since  $F_n \equiv 0$  and  $W_q(nh) \equiv 0$  when  $n < 0$ .

Assuming the induction hypothesis, we show the same holds true on  $(-\infty, t + x_1]$ . Consider a sequence  $h_k, n_k$ , with  $h_k \rightarrow 0$ ,  $n_k h_k \rightarrow t + x_1$ . To simplify notation, we now drop the

subscript  $k$  on  $h, n$ . Subtracting (17) from (5) in Shortle et al. (2005) gives:

$$\begin{aligned}
F_n - \hat{F}_n &= \frac{1}{1 - \lambda h} (F_{n-1} - \lambda h \sum_{i=1}^N p_i F_{n-m_i}) - (1 + \lambda h) \hat{F}_{n-1} + hQ(h(n-1)) \\
&= (1 + \lambda h)(F_{n-1} - \hat{F}_{n-1}) + \lambda h v_{n-1,h} + o(h^2), \\
\text{where } v_{n-1,h} &\equiv \sum_{i=1}^N p_i (W_q(nh - h - x_i) - F_{n-m_i}). \\
\Rightarrow |F_n - \hat{F}_n| &\leq (1 + \lambda h) |F_{n-1} - \hat{F}_{n-1}| + \lambda h v_{n-1,h} + D(\lambda h)^2,
\end{aligned}$$

for some constant  $D$  and small enough  $h$  (say  $h \leq h_3^*$ ).

$$\Rightarrow |F_n - \hat{F}_n| \leq e^{\lambda h} \left( |F_{n-1} - \hat{F}_{n-1}| + \lambda h v_{n-1,h} + D(\lambda h)^2 \right).$$

Similarly,  $|F_n - \hat{F}_n|$

$$\begin{aligned}
&\leq e^{\lambda h} \left( e^{\lambda h} \left( |F_{n-2} - \hat{F}_{n-2}| + \lambda h v_{n-2,h} + D(\lambda h)^2 \right) + \lambda h v_{n-1,h} + D(\lambda h)^2 \right) \\
&\leq e^{2\lambda h} \left( |F_{n-2} - \hat{F}_{n-2}| + \lambda h v_{n-2,h} + \lambda h v_{n-1,h} + 2D(\lambda h)^2 \right) \\
&\leq e^{m\lambda h} \left( |F_{n-m} - \hat{F}_{n-m}| + \lambda h \sum_{l=1}^m v_{n-l,h} + mD(\lambda h)^2 \right).
\end{aligned}$$

where  $m$  is the integer chosen so that  $(n-m)h \approx t$ ; specifically, let  $t \geq (n-m)h > t-h$ . So,  $mh \leq nh - t + h \leq x_1 + 1$ , for small enough  $h$ , since  $nh \rightarrow t + x_1$ . So, the above equation

$$\leq e^{(x_1+1)\lambda} \left( |F_{n-m} - \hat{F}_{n-m}| + \lambda h \left( \sum_{l=1}^m v_{n-l,h} + D(x_1+1)\lambda \right) \right). \quad (18)$$

Now,  $|F_{n-m} - \hat{F}_{n-m}|$  can be made less than an arbitrary  $\epsilon > 0$ , for small enough  $h$  since  $|F_{n-m} - \hat{F}_{n-m}| \leq |F_{n-m} - W_q((n-m)h)| + |W_q((n-m)h) - \hat{F}_{n-m}|$ , and the first term can be made arbitrarily small by the induction hypothesis (since  $(n-m)h \rightarrow t$ ), and the second term can be made arbitrarily small by Step 2. Therefore, to show that (18) can be made less than an arbitrary  $\epsilon > 0$  for small enough  $h$ , it remains to show that  $\lambda h \sum_{l=1}^m v_{n-l,h} \rightarrow 0$ .

Now,

$$\sum_{l=1}^m v_{n-l,h} = \sum_{i=1}^N p_i \sum_{l=1}^m (W_q((n-l)h - x_i) - F_{n-l+1-m_i}),$$

and

$$\begin{aligned}
|W_q((n-l)h - x_i) - F_{n-l+1-m_i}| &\leq \\
|W_q((n-l)h - x_i) - W_q((n-l+1-m_i)h)| &+ |W_q((n-l+1-m_i)h) - F_{n-l+1-m_i}|.
\end{aligned}$$

By the induction hypothesis, the last term can be made less than an arbitrary  $\epsilon > 0$  for  $h \leq$  some  $h_4^*$ , for all  $l$  (since  $(n - l + 1 - m_i)h \leq (n + 1 - m_i)h \rightarrow t$ , since  $nh \rightarrow t + x_i$  and  $m_i h \rightarrow x_i$ ).

For the first term, the definition of  $m_i = \lceil x_i/h \rceil$  implies  $x_i/h \leq m_i < x_i/h + 1$  which implies  $h - x_i \geq h - hm_i > -x_i$  which implies

$$h \geq (n - l + 1 - m_i)h - ((n - l)h - x_i) > 0,$$

so there is at most one  $l$  where  $(n - l + 1 - m_i)h \geq 0$ , and  $(n - l)h - x_i < 0$ . Since  $W_q$  is continuous everywhere except at 0,  $W_q' \leq \lambda$  everywhere except at a finite number of points, and  $|(n - l + 1 - m_i - 1)h - ((n - l)h - x_i)| \rightarrow 0$ , the second term can be made less than any  $\epsilon$  uniformly for all  $l = 1, \dots, m$  except for at most one  $l$  in this set. So,

$$\sum_{l=1}^m |W_q((n - l)h - x_i) - F_{n-l+1-m_i}| \leq (m - 1)\epsilon + 1 + m\epsilon.$$

So,

$$h\lambda \sum_{l=1}^m v_{n-l,h} \leq h\lambda(2m\epsilon + 1)$$

which can be made arbitrarily small since  $mh \rightarrow x_1$  and  $\epsilon$  can be selected arbitrarily. Thus,  $|F_n - \hat{F}_n|$  can be made arbitrarily small. Also, for  $n' \leq n$ , the equivalent bound for  $|F_{n'} - \hat{F}_{n'}|$  in (18) is less than or equal to the bound for  $|F_n - \hat{F}_n|$  in (18). Thus,  $|F_n - \hat{F}_n|$  converges uniformly to 0 for all  $n' \leq n$ . By step 2 in this proof,  $|\hat{F}_n - W_q(nh)|$  converges uniformly to 0. Thus,  $|F_n - W_q(nh)|$  converges uniformly to 0.  $\square$

**Proof of Theorem 2.** The Laplace transform of  $D_N$  in the form of (19) (see Lemma 1) is:

$$g^*(-iu) = \left( \sum_{i=1}^N p_i \cos(ux_i) \right) + i \left( \sum_{i=1}^N p_i \sin(ux_i) \right).$$

Using (20) from Lemma 1 and letting  $u$  be large gives the result.  $\square$

**Proof of Theorem 3.** The Laplace transform of  $U_N$  in the form of (19) (see Lemma 1) is:

$$g^*(-iu) = \left( \frac{1}{u} \sum_{i=1}^N \frac{p_i}{x_i} \sin(ux_i) \right) + i \left( \frac{1}{u} \sum_{i=1}^N \frac{p_i}{x_i} (1 - \cos(ux_i)) \right).$$

Using (20) from Lemma 1 and letting  $u$  be large gives the result.  $\square$

**Lemma 1.** *Suppose the service distribution for an M/G/1 queue has Laplace transform  $g^*(s)$  and that*

$$g^*(-iu) = a(u) + ib(u). \quad (19)$$

*Let  $\phi(u)$  (see (14), Shortle et al. 2005) be the transform of  $\tilde{W}_q(t) = P(W_q \leq t | W_q > 0)$ . Then,*

$$Re(\phi(u)) = \frac{1 - \rho}{\rho} \left( \frac{-(\lambda a(u) - \lambda)^2 + \lambda b(u)(\lambda b(u) - u)}{(\lambda a(u) - \lambda)^2 + (\lambda b(u) - u)^2} \right). \quad (20)$$

*Proof.* Plugging (19) into (14) gives:

$$\phi(u) = \frac{1 - \rho}{\rho} \left( \frac{-iu}{\lambda a(u) - \lambda + (\lambda b(u) - u)i} - 1 \right).$$

Putting over a common denominator and taking the real part gives the result. □

## References

- Hairer, E., S. Nørsett, G. Wanner. 1991. *Solving Ordinary Differential Equations I*. Springer-Verlag, New York.
- Shortle, J., M. Fischer, P. Brill. 2005. Waiting time distribution of M/D<sub>N</sub>/1 queues through numerical Laplace inversion. *INFORMS J. Comput.* To appear.
